# Supplementary material for: Profile of TREM2-Derived circRNA and mRNA Variants in the Entorhinal Cortex of Alzheimer’s Disease Patients
Source: MDPI journal article supplement (doi:10.3390/ijms23147682), 2022-07-12
Supplement: s1 [file s1]

A

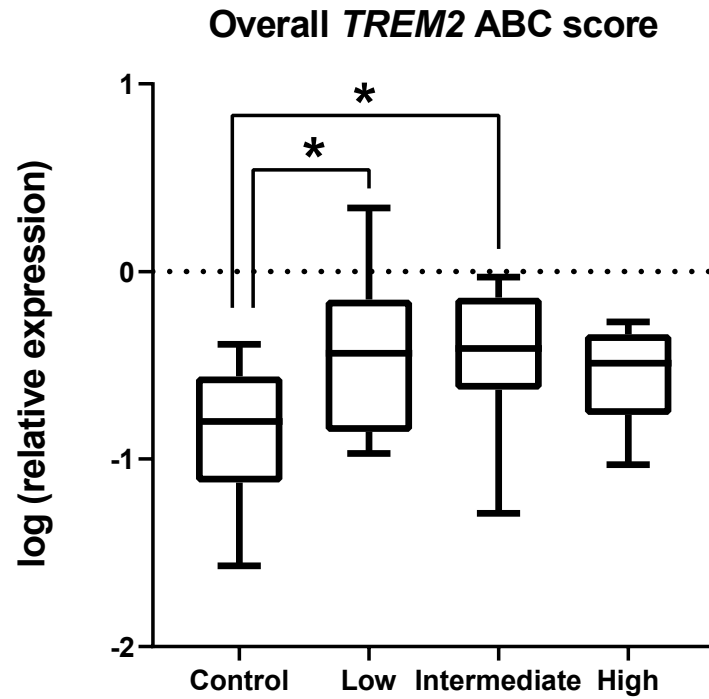

B

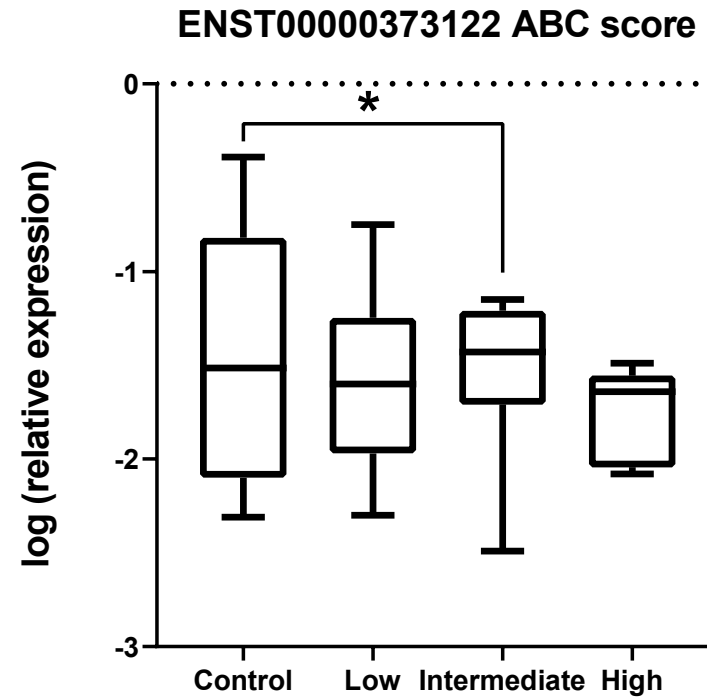

Additional figure S5. Expression of *TREM2* mRNA by ABC score. A) Box-plot represents the expression of *TREM2* mRNA by ABC score. B) Box-plot represents the expression of ENST00000373122 transcript by ABC score. Vertical lines represent the SE.\*p-value<0.05.
