# Supplementary material for: Profile of TREM2-Derived circRNA and mRNA Variants in the Entorhinal Cortex of Alzheimer’s Disease Patients
Source: MDPI journal article supplement (doi:10.3390/ijms23147682), 2022-07-12
Supplement: s1 [file s1]

Additional Table S1: Sequence of set of primers used for RT-PCR and RTqPCR experiments

|                           |                   |                                              | Amplicon molecular weight (bp) expected for each circTREM2/primer set |                                                    |             |
|---------------------------|-------------------|----------------------------------------------|-----------------------------------------------------------------------|----------------------------------------------------|-------------|
|                           |                   |                                              | circTREM2_1                                                           | circTREM2_2                                        | circTREM2_3 |
| Divergent PCR primers set | circTREM2_4-5     | GTGGGGAGGTGGTAAGAACA                         | CCAGGAGGAGAAGGATGGA                                                   | -                                                  | -           |
|                           | circTREM2_3-4     | ACAGAAGCCAGGGACACATC                         | CATCCTCGAAGCTCTCAGAC                                                  | 358                                                | 427         |
|                           | circTREM2_2-4     | ACAGAAGCCAGGGACACATC                         | CTGGTAGAGACCCGCATCAT                                                  | 228                                                | 297         |
|                           | circTREM2_2-3     | CATGTGGAGCACAGCATCTC                         | CTGGTAGAGACCCGCATCAT                                                  | 368                                                | 437         |
|                           | circTREM2_3-5     | GAAAAGCCCAGGAGAAGTCC                         | GGAACCAGAGATCTCCAGCA                                                  | 221                                                | -           |
| TaqMan assay              |                   | Forward 5'->3'                               | Reverse 5'->3'                                                        | Probe 5'->3'                                       |             |
|                           | circTREM2<br>ACTB | CAGGGTATCAGCTCCAACTC<br>ACCTTCTACAATGAGCTGCG | AGCGTAATGGTGAGAGTGC<br>CCTGGATAGCAACGTACATGG                          | ATCGTCTGTGATGGCTGTGCTGG<br>ATCTGGGTCATCTTCTCGCGTTG |             |
| SYBR Green assay          |                   | Forward 5'->3'                               | Reverse 5'->3'                                                        |                                                    |             |
|                           | TREM2_overall     | CTGCTCATCTTACTCTTTGTCAC                      | CAGTGCTTCATGGAGTCATAGG                                                |                                                    |             |
|                           | ENST00000373122   | TTCGAGGATGCCCATGTG                           | GGAGAGACAAGAAGGCAGATG                                                 |                                                    |             |
|                           | ENST00000373113   | GCATCTCCAGGAGCCTCT                           | ATGTGTCCCTGGCTTCTGTC                                                  |                                                    |             |
|                           | ENST00000338469   | AGCCATCACAGACGATACCC                         | TCTCAGCCCTGGAGATGC                                                    |                                                    |             |
|                           | D2-TREM2*         | TTACTCTTTGTCACAGACCCC                        | GGGCATCCTCGAAGCTCT                                                    |                                                    |             |
|                           | GAPDH             | ACATCGCTCAGACACCATG                          | TGTAGTTGAGGTCAATGAAGGG                                                |                                                    |             |
|                           | ACTB              | GGACTTCGAGCAAGAGATGG                         | AGCACTGTGTTGGCGTACAG                                                  |                                                    |             |

\*Original reference is provided in 5. Materials and methods section
