# Supplementary material for: Profile of TREM2-Derived circRNA and mRNA Variants in the Entorhinal Cortex of Alzheimer’s Disease Patients
Source: MDPI journal article supplement (doi:10.3390/ijms23147682), 2022-07-12
Supplement: s1 [file s1]

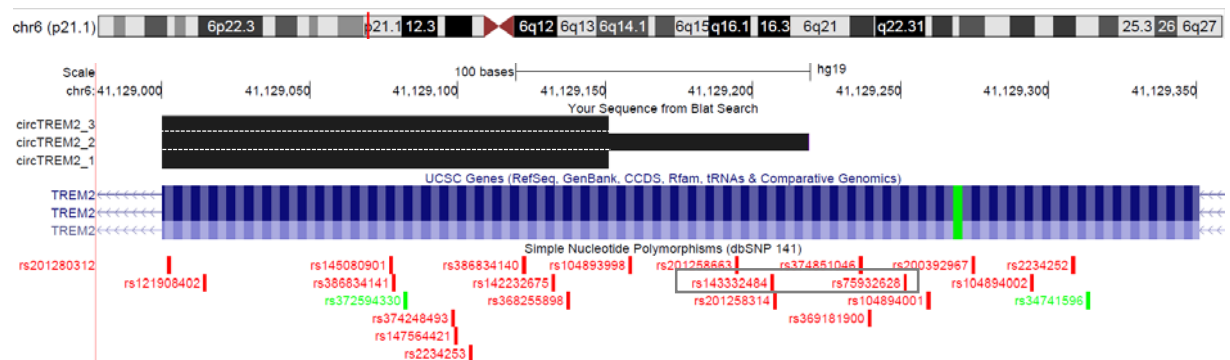

**Additional Figure S3.** In exon 2 of *TREM2* has been described 2 SNPs that are risk factors of AD. The image shows in black the sequence of exon 2 included in each circTREM2, in blue the exon 2 of the *TREM2* gene and in red and green the SNPs described in this exon, the 2 in the grey box are the ones described as risk factors for AD.
