# Supplementary material for: Profile of TREM2-Derived circRNA and mRNA Variants in the Entorhinal Cortex of Alzheimer’s Disease Patients
Source: MDPI journal article supplement (doi:10.3390/ijms23147682), 2022-07-12
Supplement: s1 [file s1]

**Additional Table S2. Brain sample set characteristics.** The table shows the characteristic of the samples included in the study. No.: Number; NPD: no protein deposit; h: hours; PMI: *post mortem* interval.

| Nº | Braak stage | ABC score | ABC scale | Gender | % A $\beta$ plaque area | Age at death (years) | PMI (h) |
|----|-------------|-----------|-----------|--------|-------------------------|----------------------|---------|
| 1  | III         | A1B2C1    | Low       | Female | 0,349                   | 96                   | 1,5     |
| 2  | III         | A1B2C1    | Low       | Female | 0,044                   | 88                   | 33      |
| 3  | I           | A1B1C1    | Low       | Female | 0.00                    | 85                   | 4,3     |
| 4  | NA          | NA        | NA        | Female | 0,672                   | 69                   | NA      |
| 5  | II          | A1B1C1    | Low       | Female | 0,147                   | 66                   | 1,4     |
| 6  | III         | A1B2C3    | Int       | Female | 0,648                   | 84                   | 13      |
| 7  | IV          | A2B2C2    | Int       | Female | 0,814                   | 97                   | NA      |
| 8  | IV          | A2B2C3    | Int       | Male   | 0,420                   | 78                   | 5       |
| 9  | I           | A1B1C1    | Low       | Male   | 0,000                   | 60                   | 15,3    |
| 10 | V           | A3B3C2    | High      | Male   | NA                      | 91                   | 5       |
| 11 | III         | A3B2C3    | Int       | Male   | 0,724                   | 83                   | 9       |
| 12 | IV          | A3B2C1    | Int       | Female | 0,131                   | 90                   | 3       |
| 13 | I           | A1B1C1    | Low       | Male   | 0,024                   | 85                   | 3,2     |
| 14 | III         | A3B2C3    | Int       | Female | 0,376                   | 85                   | NA      |
| 15 | III-IV      | A3B2C3    | Int       | Female | 0,357                   | 98                   | 3       |
| 16 | IV          | A2B2C2    | Int       | Female | 0,431                   | 91                   | 10      |
| 17 | III         | A2B2C3    | Int       | Female | 0,528                   | 98                   | 23      |
| 18 | V           | A3B3C3    | High      | Female | 0,777                   | 77                   | 11      |
| 19 | VI          | A3B3C3    | High      | Female | 0,777                   | 86                   | 2,3     |
| 20 | V           | A3B3C2    | High      | Female | 1,610                   | 82                   | 9       |
| 21 | I           | A1B1C1    | Low       | Female | NA                      | 85                   | 2       |
| 22 | IV          | A2B2C2    | Int       | Male   | 0,959                   | 88                   | 3,5     |
| 23 | VI          | A3B3C3    | High      | Male   | 2,013                   | 70                   | 2,35    |
| 24 | II          | A2B1C3    | Low       | Male   | NA                      | 80                   | 3       |
| 25 | II          | A1B1C1    | Low       | Male   | NA                      | 74                   | 2,5     |
| 26 | II          | A1B2C2    | Int       | Female | NA                      | 71                   | 4       |
| 27 | II          | A2B1C1    | Low       | Female | NA                      | 80                   | 3,7     |
| 28 | 0           | control   | Not       | Female | NPD                     | 43                   | 3       |
| 29 | 0           | control   | Not       | Male   | NPD                     | 54                   | 18      |
| 30 | 0           | control   | Not       | Female | NPD                     | 19                   | NA      |
| 31 | 0           | control   | Not       | Female | NPD                     | 46                   | 7       |
| 32 | 0           | control   | Not       | Male   | NPD                     | 28                   | 6       |
| 33 | 0           | control   | Not       | Male   | NPD                     | 41                   | 3,5     |
| 34 | 0           | control   | Not       | Male   | NPD                     | 54                   | 2,7     |
| 35 | 0           | control   | Not       | Male   | NPD                     | 81                   | 10,5    |
| 36 | 0           | control   | Not       | Male   | NPD                     | 26                   | 6,2     |
| 37 | 0           | control   | Not       | Male   | NPD                     | 53                   | 7       |
| 38 | 0           | control   | Not       | Female | NPD                     | 88                   | 9       |
| 39 | 0           | control   | Not       | Male   | NPD                     | 66                   | 6,5     |
| 40 | 0           | control   | Not       | Female | NPD                     | 88                   | 3,5     |
| 41 | 0           | control   | Not       | Female | NPD                     | 76                   | 11,5    |
| 42 | 0           | control   | Not       | Male   | NPD                     | 65                   | 3       |
| 43 | 0           | control   | Not       | Male   | NPD                     | 83                   | NA      |
