# Supplementary material for: Profile of TREM2-Derived circRNA and mRNA Variants in the Entorhinal Cortex of Alzheimer’s Disease Patients
Source: Int J Mol Sci. 2022 Jul 12;23(14):7682. doi: 10.3390/ijms23147682 (PMC9320643; doi:10.3390/ijms23147682)
Supplement: Supplementary file 1 [file ijms-23-07682-s001.zip]

Archive with 7 entries (7 files):
- Additional Figure s1.pdf
- Additional Figure s2.pdf
- Additional Figure s3.pdf
- Additional Figure s4.pdf
- Additional Figure s5.pdf
- Additional table s1.pdf
- Additional table s2.pdf
