# Supplementary figures and images for: Profile of TREM2-Derived circRNA and mRNA Variants in the Entorhinal Cortex of Alzheimer’s Disease Patients
Source: MDPI journal article supplement (doi:10.3390/ijms23147682), 2022-07-12

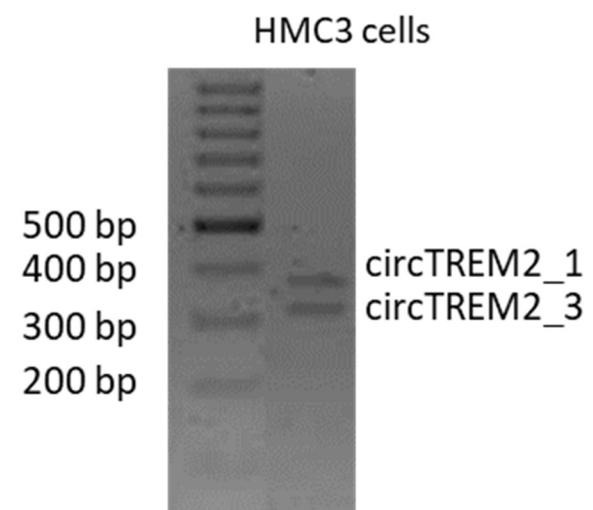

**Additional Figure S4.** RT-PCR products of circTREM2\_2-3 primers set from HMC3 cells in agarose gel.

Supplement: s1 [file s1]

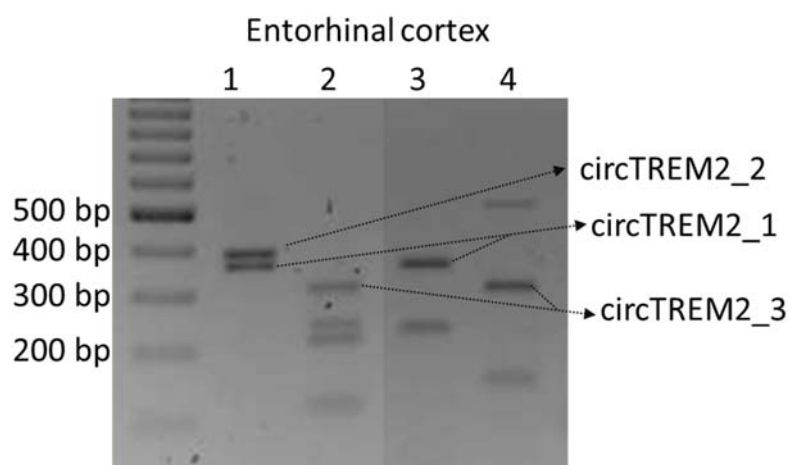

**Additional Figure S2. RT-PCR products of circTREM2\_3-4 primers set in agarose gel.**

Supplement: s1 [file s1]
